# Supplementary material
Source: Royal Society of Chemistry journal article supplement (doi:10.1039/d6ce00119j)

## Supporting Information

### Solvent-Free Modafinil Acid Cocrystallization through Green Melt-based Approach

Timothy Joseph Hutagaol <sup>a</sup>, Jianmin Zhou <sup>a,b</sup>, Ziyi Liu <sup>a,b</sup>, Zhenguo Gao <sup>a,b,c\*</sup>, Junbo Gong <sup>a,b</sup>

<sup>a</sup> School of Chemical Engineering and Technology, State Key Laboratory of Chemical Engineering, Tianjin University, The Co-Innovation Center of Chemistry and Chemical Engineering of Tianjin, Tianjin, 300072, P. R. China

<sup>b</sup> Haihe Laboratory of Sustainable Chemical Transformations, Tianjin 300192, P. R. China

<sup>c</sup> Shanxi Research Institute of Huairou Laboratory, Taiyuan, Shanxi 030032, P. R. China

\*Corresponding author: Zhenguo Gao; Email: [zhenguogao@tju.edu.cn](mailto:zhenguogao@tju.edu.cn)

#### T1. CCPT Cocrystal Prediction Score

| Modafinil Acid                                                                      | Coformer Compound                                                                   | Score       |
|-------------------------------------------------------------------------------------|-------------------------------------------------------------------------------------|-------------|
| 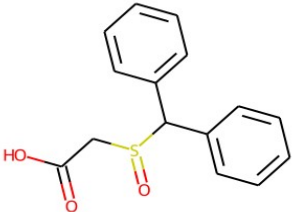 |  | 39.67306137 |
|  |  | 37.67663574 |

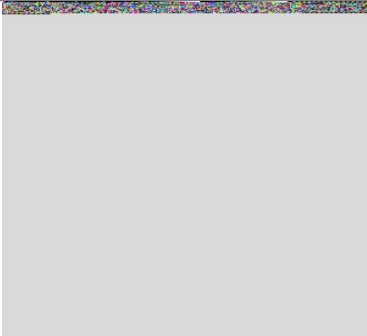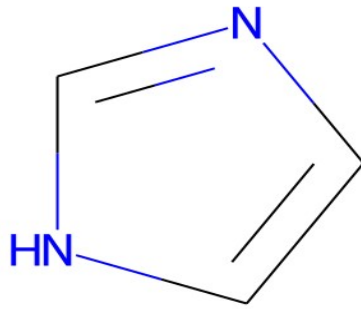

36.7094841

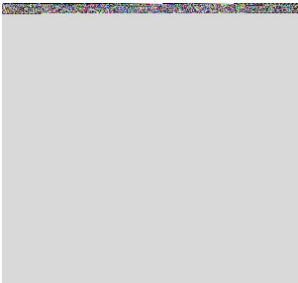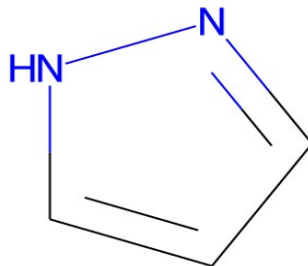

36.25755692

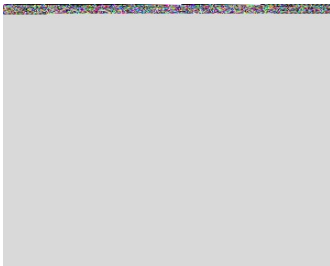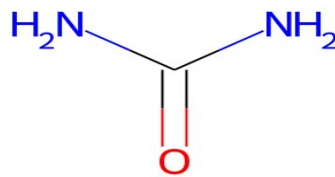

35.81337357

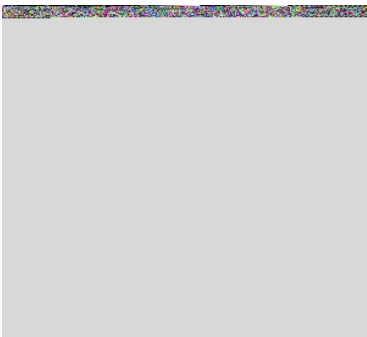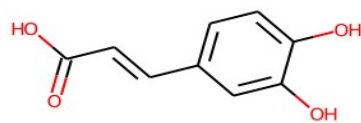

30.74576187

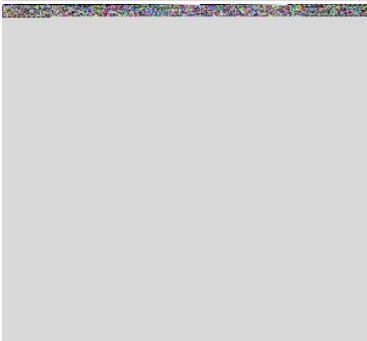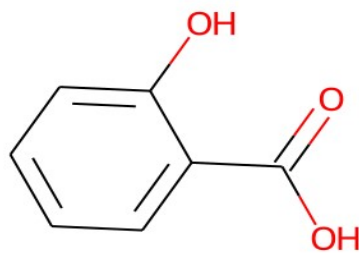

29.89514923

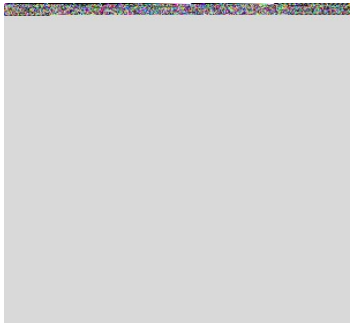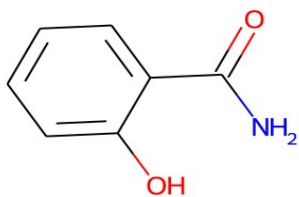

29.31505394

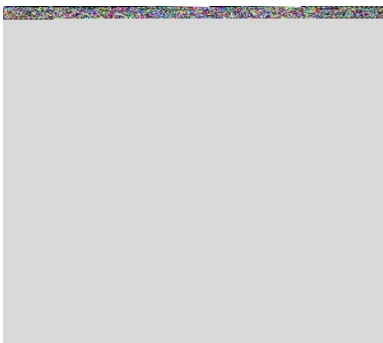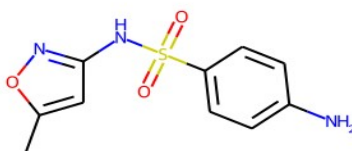

28.36584854

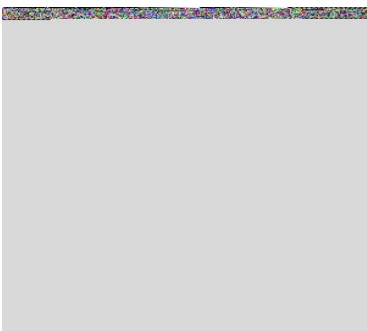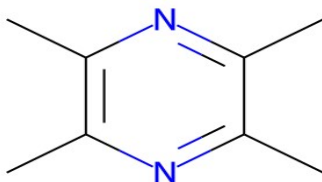

26.62135315

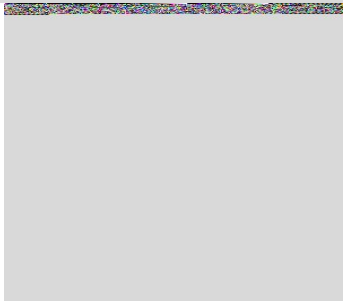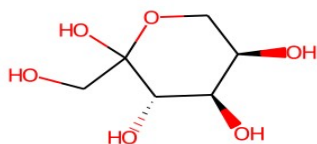

26.05613899

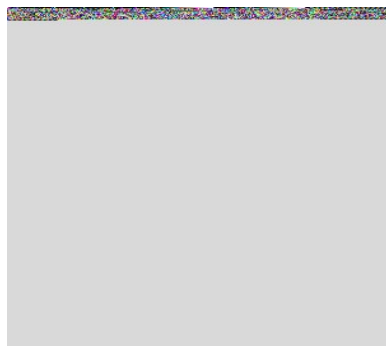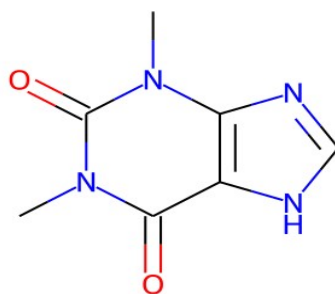

24.82731819

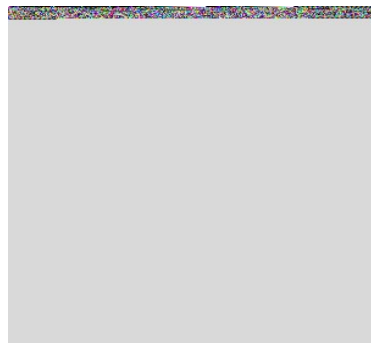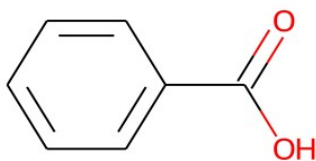

24.79765129

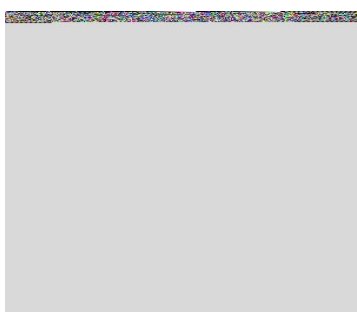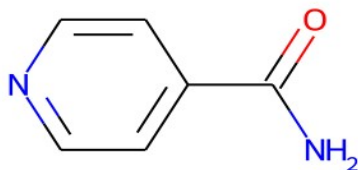

23.77697372

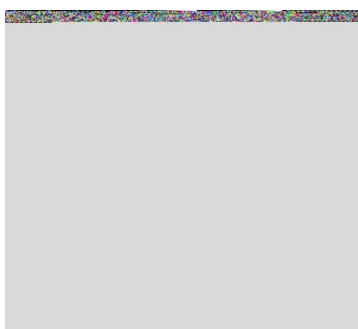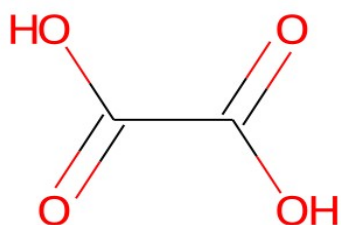

21.91519165

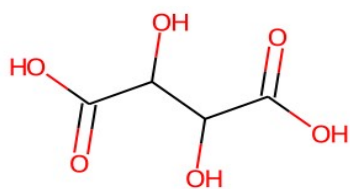

21.21183205

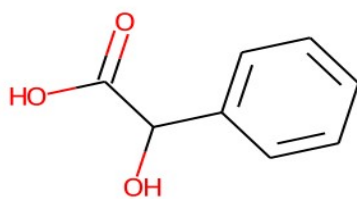

19.9114933

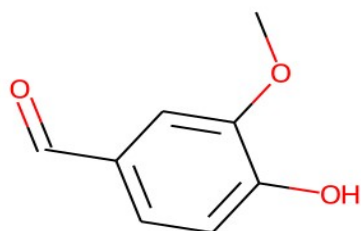

16.02734756

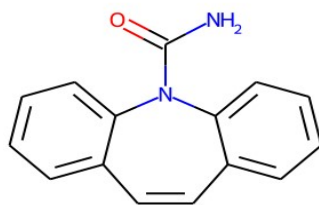

15.25044632

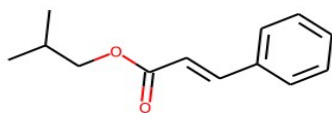

14.20041275

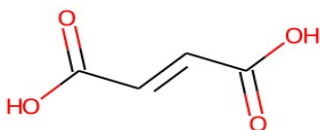

8.832574844

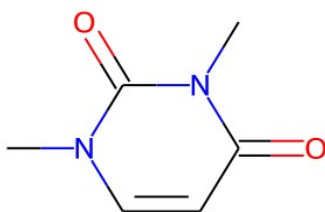

2.06095171

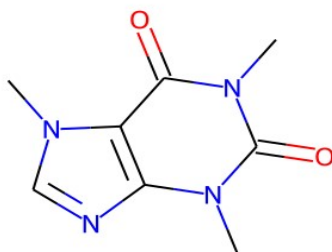

-9.772455215

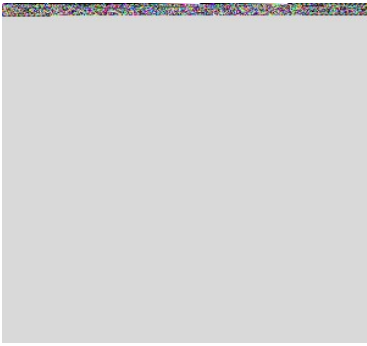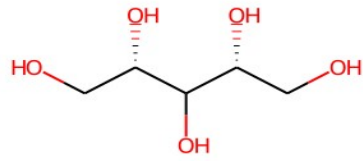

-17.88008499

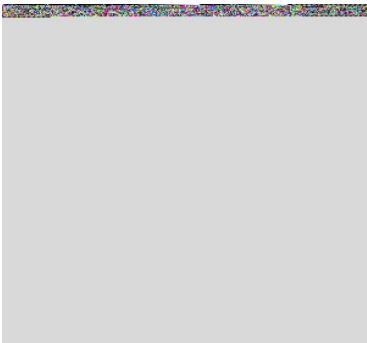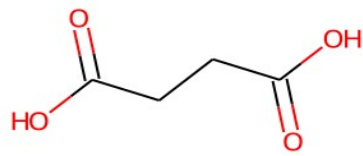

-21.58124924

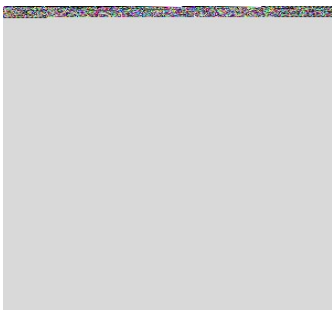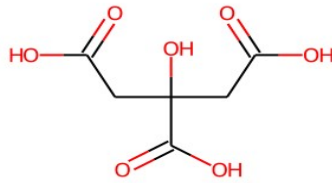

-22.80604553

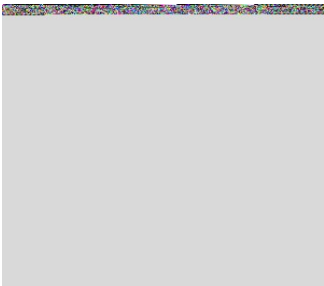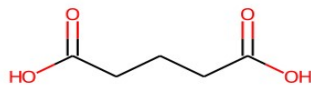

-43.89781952

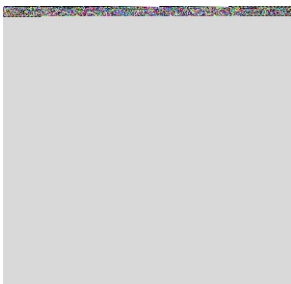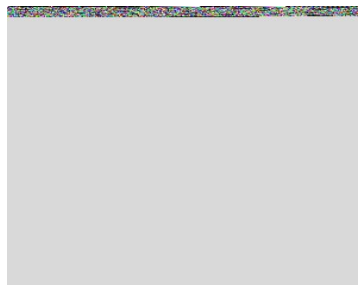

29.89514923

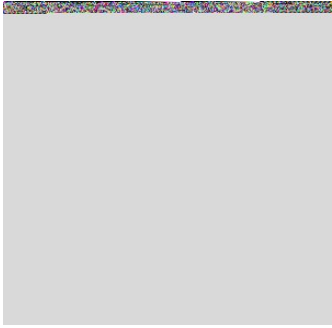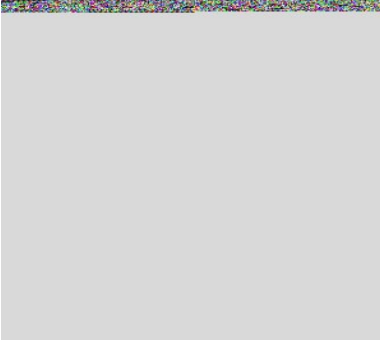

29.31505394

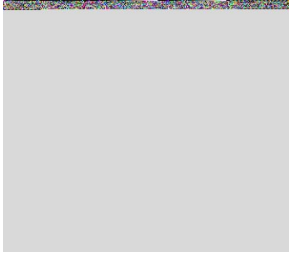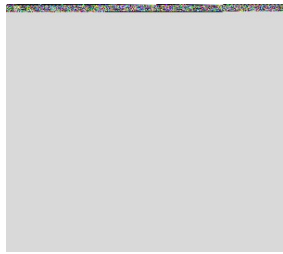

24.79765129

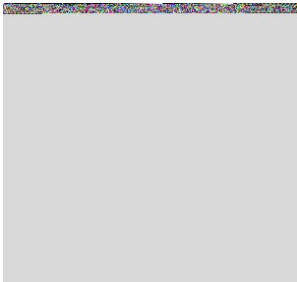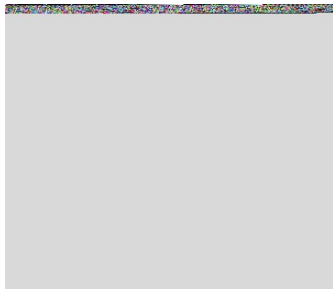

23.77697372

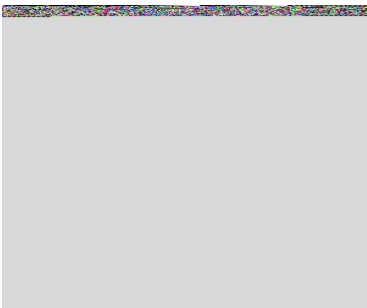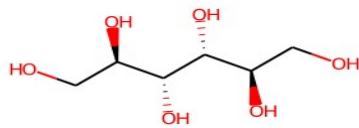

-0.858127356

---

## T2 Molecular Complementarity Coformer Screening Descriptor Criteria

| Coformer                     | Hit Rate% | PASS/FAIL<br>Criteria |
|------------------------------|-----------|-----------------------|
| 2-amino-5-methylbenzoic_acid | 100       | PASS                  |
| 3-methylpyridine             | 100       | PASS                  |
| 4-acetamidobenzoic_acid      | 100       | PASS                  |
| 4-aminobenzoic_acid          | 100       | PASS                  |
| 4-hydroxybenzoic_acid        | 100       | PASS                  |
| D-alanine                    | 0         | FAIL                  |
| D-glucuronic_acid            | 0         | FAIL                  |
| D-pantothenol                | 100       | PASS                  |
| EDTA                         | 0         | FAIL                  |
| L-arginine                   | 0         | FAIL                  |
| L-aspartic_acid              | 0         | FAIL                  |
| L-aspartic_acid_z            | 0         | FAIL                  |
| L-glutamic_acid              | 0         | FAIL                  |
| L-glutamic_acid_z            | 0         | FAIL                  |
| L-glutamine                  | 0         | FAIL                  |
| L-glutathione                | 100       | PASS                  |
| L-lactic_acid                | 0         | FAIL                  |
| L-leucine                    | 100       | PASS                  |
| L-methionine                 | 100       | PASS                  |
| L-phenylalanine              | 100       | PASS                  |
| L-proline                    | 100       | PASS                  |
| L-serine                     | 0         | FAIL                  |
| L-tartaric_acid              | 0         | FAIL                  |
| L-tryptophan                 | 100       | PASS                  |
| L-tyrosine                   | 100       | PASS                  |
| N,N-dimethylacetamide        | 100       | PASS                  |
| N-ethylacetamide             | 100       | PASS                  |
| acesulfame                   | 0         | FAIL                  |
| acetic_acid                  | 0         | FAIL                  |
| acetophenone_oxime           | 100       | PASS                  |
| acetylenedicarboxylic_acid   | 0         | FAIL                  |
| adipic_acid                  | 100       | PASS                  |
| alitame                      | 100       | PASS                  |
| apigenin                     | 100       | PASS                  |
| azelaic_acid                 | 0         | FAIL                  |
| benzoic_acid                 | 100       | PASS                  |
| biotin                       | 100       | PASS                  |
| caprolactam                  | 100       | PASS                  |
| capsaicin                    | 0         | FAIL                  |
| cholic_acid                  | 0         | FAIL                  |

---

|                              |     |      |
|------------------------------|-----|------|
| <b>citric_acid</b>           | 0   | FAIL |
| <b>ethylparaben</b>          | 100 | PASS |
| <b>folic_acid</b>            | 0   | FAIL |
| <b>fumaric_acid</b>          | 0   | FAIL |
| <b>gentisic_acid</b>         | 100 | PASS |
| <b>glutaric_acid</b>         | 100 | PASS |
| <b>glycine</b>               | 0   | FAIL |
| <b>glycolic_acid</b>         | 0   | FAIL |
| <b>hesperetin</b>            | 100 | PASS |
| <b>hippuric_acid</b>         | 100 | PASS |
| <b>hydrocinnamic_acid</b>    | 100 | PASS |
| <b>imidazole</b>             | 100 | PASS |
| <b>isonicotinamide</b>       | 100 | PASS |
| <b>ketoglutaric_acid</b>     | 0   | FAIL |
| <b>lactobionic_acid</b>      | 0   | FAIL |
| <b>lactose</b>               | 0   | FAIL |
| <b>maleic_acid</b>           | 0   | FAIL |
| <b>malic_acid</b>            | 0   | FAIL |
| <b>malonic_acid</b>          | 0   | FAIL |
| <b>maltitol</b>              | 0   | FAIL |
| <b>mannitol</b>              | 0   | FAIL |
| <b>methanesulfonic_acid</b>  | 0   | FAIL |
| <b>methylparaben</b>         | 100 | PASS |
| <b>monobutyryn</b>           | 100 | PASS |
| <b>nicotinamide</b>          | 100 | PASS |
| <b>oxalic_acid</b>           | 0   | FAIL |
| <b>pamoic_acid</b>           | 100 | PASS |
| <b>phthalamide</b>           | 100 | PASS |
| <b>pimelic_acid</b>          | 0   | FAIL |
| <b>piperazine</b>            | 100 | PASS |
| <b>propylparaben</b>         | 100 | PASS |
| <b>pyrazine</b>              | 100 | PASS |
| <b>riboflavin</b>            | 100 | PASS |
| <b>salicylic acid</b>        | 100 | PASS |
| <b>salicylamide</b>          | 100 | PASS |
| <b>suberic_acid</b>          | 0   | FAIL |
| <b>succinic_acid</b>         | 0   | FAIL |
| <b>t-butylamine</b>          | 0   | FAIL |
| <b>t-butylhydroxyanisole</b> | 100 | PASS |
| <b>theophylline</b>          | 0   | FAIL |
| <b>thymidine</b>             | 100 | PASS |
| <b>triphenylacetic_acid</b>  | 100 | PASS |
| <b>urea</b>                  | 0   | FAIL |
| <b>valerolactam</b>          | 100 | PASS |

---

xanthine

0

FAIL

**T2 Molecular Complementarity Cofomer Screening Descriptor Results (continued)**

| <b>Cofomer Conformation</b>         | <b>S/L axis ratio</b> | <b> S/L axis <br/>(pass &lt; 0.275)</b> | <b>S/L axis ratio<br/>pass/fail</b> |
|-------------------------------------|-----------------------|-----------------------------------------|-------------------------------------|
| <b>2-amino-5-methylbenzoic_acid</b> | 0.408                 | 0.103                                   | pass                                |
| <b>3-methylpyridine</b>             | 0.502                 | 0.01                                    | pass                                |
| <b>4-acetamidobenzoic_acid</b>      | 0.32                  | 0.191                                   | pass                                |
| <b>4-aminobenzoic_acid</b>          | 0.355                 | 0.156                                   | pass                                |
| <b>4-hydroxybenzoic_acid</b>        | 0.357                 | 0.154                                   | pass                                |
| <b>D-alanine</b>                    | 0.767                 | 0.255                                   | pass                                |
| <b>D-glucuronic_acid</b>            | 0.676                 | 0.165                                   | pass                                |
| <b>D-pantothenol</b>                | 0.562                 | 0.051                                   | pass                                |
| <b>EDTA</b>                         | 0.486                 | 0.025                                   | pass                                |
| <b>L-arginine</b>                   | 0.464                 | 0.048                                   | pass                                |
| <b>L-aspartic_acid</b>              | 0.656                 | 0.145                                   | pass                                |
| <b>L-aspartic_acid_z</b>            | 0.621                 | 0.11                                    | pass                                |
| <b>L-glutamic_acid</b>              | 0.563                 | 0.052                                   | pass                                |
| <b>L-glutamic_acid_z</b>            | 0.564                 | 0.053                                   | pass                                |
| <b>L-glutamine</b>                  | 0.659                 | 0.148                                   | pass                                |
| <b>L-glutathione</b>                | 0.478                 | 0.033                                   | pass                                |
| <b>L-lactic_acid</b>                | 0.774                 | 0.263                                   | pass                                |
| <b>L-leucine</b>                    | 0.656                 | 0.144                                   | pass                                |
| <b>L-methionine</b>                 | 0.531                 | 0.02                                    | pass                                |
| <b>L-phenylalanine</b>              | 0.483                 | 0.028                                   | pass                                |
| <b>L-proline</b>                    | 0.716                 | 0.205                                   | pass                                |
| <b>L-serine</b>                     | 0.691                 | 0.18                                    | pass                                |
| <b>L-tartaric_acid</b>              | 0.671                 | 0.16                                    | pass                                |
| <b>L-tryptophan</b>                 | 0.53                  | 0.019                                   | pass                                |
| <b>L-tyrosine</b>                   | 0.571                 | 0.06                                    | pass                                |
| <b>Molecule Name</b>                | 0.344                 | 0.167                                   | pass                                |
| <b>N-ethylacetamide</b>             | 0.478                 | 0.033                                   | pass                                |
| <b>acesulfame</b>                   | 0.648                 | 0.137                                   | pass                                |
| <b>acetic_acid</b>                  | 0.69                  | 0.179                                   | pass                                |
| <b>acetophenone_oxime</b>           | 0.442                 | 0.069                                   | pass                                |
| <b>acetylenedicarboxylic_acid</b>   | 0.415                 | 0.096                                   | pass                                |
| <b>adipic_acid</b>                  | 0.361                 | 0.15                                    | pass                                |
| <b>alitame</b>                      | 0.605                 | 0.094                                   | pass                                |
| <b>apigenin</b>                     | 0.25                  | 0.261                                   | pass                                |
| <b>azelaic_acid</b>                 | 0.262                 | 0.249                                   | pass                                |
| <b>benzoic_acid</b>                 | 0.382                 | 0.129                                   | pass                                |
| <b>biotin</b>                       | 0.471                 | 0.04                                    | pass                                |
| <b>caprolactam</b>                  | 0.697                 | 0.186                                   | pass                                |
| <b>capsaicin</b>                    | 0.319                 | 0.192                                   | pass                                |

|                              |       |       |      |
|------------------------------|-------|-------|------|
| <b>cholic_acid</b>           | 0.405 | 0.106 | pass |
| <b>citric_acid</b>           | 0.617 | 0.106 | pass |
| <b>ethylparaben</b>          | 0.383 | 0.128 | pass |
| <b>folic_acid</b>            | 0.365 | 0.146 | pass |
| <b>fumaric_acid</b>          | 0.382 | 0.129 | pass |
| <b>gentisic_acid</b>         | 0.398 | 0.113 | pass |
| <b>glutaric_acid</b>         | 0.386 | 0.125 | pass |
| <b>glycine</b>               | 0.577 | 0.066 | pass |
| <b>glycolic_acid</b>         | 0.599 | 0.088 | pass |
| <b>hesperetin</b>            | 0.575 | 0.064 | pass |
| <b>hippuric_acid</b>         | 0.489 | 0.022 | pass |
| <b>hydrocinnamic_acid</b>    | 0.67  | 0.159 | pass |
| <b>imidazole</b>             | 0.552 | 0.041 | pass |
| <b>isonicotinamide</b>       | 0.412 | 0.099 | pass |
| <b>ketoglutaric_acid</b>     | 0.39  | 0.121 | pass |
| <b>lactobionic_acid</b>      | 0.661 | 0.15  | pass |
| <b>lactose</b>               | 0.515 | 0.004 | pass |
| <b>maleic_acid</b>           | 0.411 | 0.101 | pass |
| <b>malic_acid</b>            | 0.521 | 0.01  | pass |
| <b>malonic_acid</b>          | 0.53  | 0.019 | pass |
| <b>maltitol</b>              | 0.679 | 0.168 | pass |
| <b>mannitol</b>              | 0.753 | 0.242 | pass |
| <b>methanesulfonic_acid</b>  | 0.938 | 0.427 | fail |
| <b>methylparaben</b>         | 0.402 | 0.109 | pass |
| <b>monobutylin</b>           | 0.485 | 0.026 | pass |
| <b>nicotinamide</b>          | 0.386 | 0.125 | pass |
| <b>oxalic_acid</b>           | 0.52  | 0.009 | pass |
| <b>pamoic_acid</b>           | 0.602 | 0.091 | pass |
| <b>phthalamide</b>           | 0.567 | 0.056 | pass |
| <b>pimelic_acid</b>          | 0.323 | 0.188 | pass |
| <b>piperazine</b>            | 0.697 | 0.186 | pass |
| <b>propylparaben</b>         | 0.371 | 0.14  | pass |
| <b>pyrazine</b>              | 0.547 | 0.036 | pass |
| <b>riboflavin</b>            | 0.502 | 0.009 | pass |
| <b>saccharin</b>             | 0.629 | 0.118 | pass |
| <b>sorbic_acid</b>           | 0.379 | 0.132 | pass |
| <b>suberic_acid</b>          | 0.295 | 0.216 | pass |
| <b>succinic_acid</b>         | 0.444 | 0.067 | pass |
| <b>t-butylamine</b>          | 0.889 | 0.378 | fail |
| <b>t-butylhydroxyanisole</b> | 0.606 | 0.095 | pass |
| <b>theophylline</b>          | 0.425 | 0.087 | pass |
| <b>thymidine</b>             | 0.646 | 0.135 | pass |
| <b>triphenylacetic_acid</b>  | 0.74  | 0.229 | pass |
| <b>urea</b>                  | 0.547 | 0.036 | pass |

|              |       |       |      |
|--------------|-------|-------|------|
| valerolactam | 0.651 | 0.14  | pass |
| xanthine     | 0.384 | 0.127 | pass |

## T2 Molecular Complementarity Coformer Screening Descriptor Results (continued)

| Coformer Conformation        | Overall<br>PASS/FAIL | M/L<br>axis | M/L <br>(pass <<br>0.31) | M/L axis<br>ratio<br>pass/fail | S axis<br>(Å) | S axis<br>(Å) <br>(pass <<br>3.23) | S axis<br>(Å)<br>pass/fail |
|------------------------------|----------------------|-------------|--------------------------|--------------------------------|---------------|------------------------------------|----------------------------|
| 2-amino-5-methylbenzoic_acid | PASS                 | 0.766       | 0.013                    | pass                           | 4.169         | 2.587                              | pass                       |
| 3-methylpyridine             | PASS                 | 0.807       | 0.027                    | pass                           | 4.167         | 2.589                              | pass                       |
| 4-acetamidobenzoic_acid      | PASS                 | 0.536       | 0.244                    | pass                           | 4.174         | 2.582                              | pass                       |
| 4-aminobenzoic_acid          | PASS                 | 0.671       | 0.108                    | pass                           | 3.54          | 3.216                              | pass                       |
| 4-hydroxybenzoic_acid        | PASS                 | 0.675       | 0.104                    | pass                           | 3.54          | 3.216                              | pass                       |
| D-alanine                    | FAIL                 | 0.944       | 0.165                    | pass                           | 5.087         | 1.669                              | pass                       |
| D-glucuronic_acid            | FAIL                 | 0.776       | 0.004                    | pass                           | 6.455         | 0.301                              | pass                       |
| D-pantothenol                | PASS                 | 0.582       | 0.198                    | pass                           | 6.932         | 0.176                              | pass                       |
| EDTA                         | FAIL                 | 0.681       | 0.098                    | pass                           | 6.595         | 0.161                              | pass                       |
| L-arginine                   | FAIL                 | 0.577       | 0.203                    | pass                           | 5.881         | 0.874                              | pass                       |
| L-aspartic_acid              | FAIL                 | 0.896       | 0.116                    | pass                           | 5.344         | 1.412                              | pass                       |
| L-aspartic_acid_z            | FAIL                 | 0.789       | 0.009                    | pass                           | 5.373         | 1.383                              | pass                       |
| L-glutamic_acid              | FAIL                 | 0.746       | 0.034                    | pass                           | 5.501         | 1.254                              | pass                       |
| L-glutamic_acid_z            | FAIL                 | 0.702       | 0.078                    | pass                           | 5.536         | 1.22                               | pass                       |
| L-glutamine                  | FAIL                 | 0.774       | 0.005                    | pass                           | 5.887         | 0.869                              | pass                       |
| L-glutathione                | PASS                 | 0.84        | 0.06                     | pass                           | 6.835         | 0.079                              | pass                       |
| L-lactic_acid                | FAIL                 | 0.897       | 0.117                    | pass                           | 5.399         | 1.357                              | pass                       |
| L-leucine                    | PASS                 | 0.853       | 0.074                    | pass                           | 5.688         | 1.068                              | pass                       |
| L-methionine                 | PASS                 | 0.681       | 0.099                    | pass                           | 5.459         | 1.297                              | pass                       |
| L-phenylalanine              | PASS                 | 0.577       | 0.203                    | pass                           | 5.567         | 1.188                              | pass                       |
| L-proline                    | PASS                 | 0.783       | 0.003                    | pass                           | 5.744         | 1.012                              | pass                       |
| L-serine                     | FAIL                 | 0.922       | 0.142                    | pass                           | 5.064         | 1.692                              | pass                       |
| L-tartaric_acid              | FAIL                 | 0.964       | 0.184                    | pass                           | 5.335         | 1.421                              | pass                       |
| L-tryptophan                 | PASS                 | 0.689       | 0.09                     | pass                           | 6.018         | 0.737                              | pass                       |
| L-tyrosine                   | PASS                 | 0.668       | 0.112                    | pass                           | 6.27          | 0.486                              | pass                       |
| Molecule Name                | PASS                 | 0.593       | 0.187                    | pass                           | 3.54          | 3.216                              | pass                       |
| N-ethylacetamide             | PASS                 | 0.683       | 0.097                    | pass                           | 4.169         | 2.587                              | pass                       |
| acesulfame                   | FAIL                 | 0.998       | 0.219                    | pass                           | 5.267         | 1.489                              | pass                       |
| acetic_acid                  | FAIL                 | 0.865       | 0.085                    | pass                           | 4.175         | 2.581                              | pass                       |
| acetophenone_oxime           | PASS                 | 0.774       | 0.006                    | pass                           | 4.181         | 2.574                              | pass                       |
| acetylenedicarboxylic_acid   | FAIL                 | 0.657       | 0.123                    | pass                           | 3.737         | 3.019                              | pass                       |
| adipic_acid                  | PASS                 | 0.475       | 0.305                    | pass                           | 4.161         | 2.594                              | pass                       |
| alitame                      | PASS                 | 0.652       | 0.128                    | pass                           | 7.989         | 1.233                              | pass                       |
| apigenin                     | PASS                 | 0.638       | 0.142                    | pass                           | 3.549         | 3.206                              | pass                       |
| azelaic_acid                 | FAIL                 | 0.351       | 0.429                    | fail                           | 4.167         | 2.589                              | pass                       |

|                              |      |       |       |      |       |       |      |
|------------------------------|------|-------|-------|------|-------|-------|------|
| <b>benzoic_acid</b>          | PASS | 0.723 | 0.056 | pass | 3.541 | 3.215 | pass |
| <b>biotin</b>                | PASS | 0.664 | 0.116 | pass | 6.324 | 0.432 | pass |
| <b>caprolactam</b>           | PASS | 0.953 | 0.173 | pass | 5.535 | 1.221 | pass |
| <b>capsaicin</b>             | FAIL | 0.445 | 0.334 | fail | 6.494 | 0.262 | pass |
| <b>cholic_acid</b>           | FAIL | 0.453 | 0.326 | fail | 7.399 | 0.644 | pass |
| <b>citric_acid</b>           | FAIL | 0.673 | 0.107 | pass | 6.253 | 0.502 | pass |
| <b>ethylparaben</b>          | PASS | 0.636 | 0.144 | pass | 4.371 | 2.384 | pass |
| <b>folic_acid</b>            | FAIL | 0.42  | 0.36  | fail | 8.015 | 1.26  | pass |
| <b>fumaric_acid</b>          | FAIL | 0.617 | 0.163 | pass | 3.54  | 3.216 | pass |
| <b>gentisic_acid</b>         | PASS | 0.868 | 0.088 | pass | 3.548 | 3.208 | pass |
| <b>glutaric_acid</b>         | PASS | 0.527 | 0.252 | pass | 4.167 | 2.589 | pass |
| <b>glycine</b>               | FAIL | 0.745 | 0.035 | pass | 4.364 | 2.391 | pass |
| <b>glycolic_acid</b>         | FAIL | 0.786 | 0.006 | pass | 4.182 | 2.573 | pass |
| <b>hesperetin</b>            | PASS | 0.682 | 0.098 | pass | 7.492 | 0.737 | pass |
| <b>hippuric_acid</b>         | PASS | 0.578 | 0.202 | pass | 5.866 | 0.89  | pass |
| <b>hydrocinnamic_acid</b>    | PASS | 0.805 | 0.025 | pass | 6.032 | 0.724 | pass |
| <b>imidazole</b>             | PASS | 0.942 | 0.162 | pass | 3.54  | 3.215 | pass |
| <b>isonicotinamide</b>       | PASS | 0.772 | 0.008 | pass | 3.551 | 3.205 | pass |
| <b>ketoglutaric_acid</b>     | FAIL | 0.574 | 0.206 | pass | 4.171 | 2.584 | pass |
| <b>lactobionic_acid</b>      | FAIL | 0.706 | 0.074 | pass | 8.159 | 1.404 | pass |
| <b>lactose</b>               | FAIL | 0.687 | 0.092 | pass | 6.591 | 0.164 | pass |
| <b>maleic_acid</b>           | FAIL | 0.69  | 0.09  | pass | 3.575 | 3.18  | pass |
| <b>malic_acid</b>            | FAIL | 0.653 | 0.127 | pass | 4.874 | 1.881 | pass |
| <b>malonic_acid</b>          | FAIL | 0.697 | 0.083 | pass | 4.15  | 2.606 | pass |
| <b>maltitol</b>              | FAIL | 0.846 | 0.067 | pass | 8.056 | 1.301 | pass |
| <b>mannitol</b>              | FAIL | 0.859 | 0.08  | pass | 6.684 | 0.072 | pass |
| <b>methanesulfonic_acid</b>  | FAIL | 0.994 | 0.215 | pass | 5.261 | 1.495 | pass |
| <b>methylparaben</b>         | PASS | 0.666 | 0.113 | pass | 4.23  | 2.526 | pass |
| <b>monobutyrim</b>           | PASS | 0.729 | 0.05  | pass | 5.161 | 1.594 | pass |
| <b>nicotinamide</b>          | PASS | 0.724 | 0.056 | pass | 3.548 | 3.208 | pass |
| <b>oxalic_acid</b>           | FAIL | 0.844 | 0.065 | pass | 3.54  | 3.216 | pass |
| <b>pamoic_acid</b>           | PASS | 0.725 | 0.055 | pass | 7.963 | 1.208 | pass |
| <b>phthalamide</b>           | PASS | 0.953 | 0.173 | pass | 5.027 | 1.728 | pass |
| <b>pimelic_acid</b>          | FAIL | 0.433 | 0.347 | fail | 4.18  | 2.576 | pass |
| <b>piperazine</b>            | PASS | 0.92  | 0.14  | pass | 4.979 | 1.777 | pass |
| <b>propylparaben</b>         | PASS | 0.532 | 0.247 | pass | 4.913 | 1.843 | pass |
| <b>pyrazine</b>              | PASS | 0.938 | 0.158 | pass | 3.55  | 3.205 | pass |
| <b>riboflavin</b>            | PASS | 0.833 | 0.053 | pass | 6.995 | 0.239 | pass |
| <b>saccharin</b>             | PASS | 0.929 | 0.149 | pass | 5.577 | 1.179 | pass |
| <b>sorbic_acid</b>           | PASS | 0.499 | 0.28  | pass | 4.166 | 2.589 | pass |
| <b>suberic_acid</b>          | FAIL | 0.393 | 0.387 | fail | 4.161 | 2.594 | pass |
| <b>succinic_acid</b>         | FAIL | 0.581 | 0.199 | pass | 4.189 | 2.567 | pass |
| <b>t-butylamine</b>          | FAIL | 0.923 | 0.144 | pass | 5.972 | 0.783 | pass |
| <b>t-butylhydroxyanisole</b> | PASS | 0.743 | 0.037 | pass | 6.735 | 0.02  | pass |

|                      |      |       |       |      |       |       |      |
|----------------------|------|-------|-------|------|-------|-------|------|
| theophylline         | FAIL | 0.884 | 0.105 | pass | 4.194 | 2.561 | pass |
| thymidine            | PASS | 0.7   | 0.08  | pass | 7.542 | 0.786 | pass |
| triphenylacetic_acid | PASS | 0.967 | 0.188 | pass | 8.323 | 1.567 | pass |
| urea                 | FAIL | 0.865 | 0.086 | pass | 3.54  | 3.216 | pass |
| valerolactam         | PASS | 0.851 | 0.071 | pass | 5.134 | 1.621 | pass |
| xanthine             | FAIL | 0.824 | 0.044 | pass | 3.545 | 3.211 | pass |

## T2 Molecular Complementarity Cofomer Screening Descriptor Results (continued)

| Cofomer Conformation         | DM (Debye) | DM (Debye)  (pass < 5.94) | DM (Debye)   pass/fail | FNO   | FNO  (pass < 0.294) | FNO pass/fail |
|------------------------------|------------|---------------------------|------------------------|-------|---------------------|---------------|
| 2-amino-5-methylbenzoic_acid | 1.361      | 0.988                     | pass                   | 0.273 | 0.115               | pass          |
| 3-methylpyridine             | 1.437      | 0.911                     | pass                   | 0.143 | 0.015               | pass          |
| 4-acetamidobenzoic_acid      | 1.612      | 0.736                     | pass                   | 0.308 | 0.15                | pass          |
| 4-aminobenzoic_acid          | 0.849      | 1.499                     | pass                   | 0.3   | 0.142               | pass          |
| 4-hydroxybenzoic_acid        | 2.205      | 0.144                     | pass                   | 0.3   | 0.142               | pass          |
| D-alanine                    | 3.343      | 0.995                     | pass                   | 0.5   | 0.342               | fail          |
| D-glucuronic_acid            | 3.657      | 1.309                     | pass                   | 0.538 | 0.381               | fail          |
| D-pantothenol                | 4.265      | 1.917                     | pass                   | 0.357 | 0.199               | pass          |
| EDTA                         | 3.05       | 0.701                     | pass                   | 0.5   | 0.342               | fail          |
| L-arginine                   | 2.027      | 0.322                     | pass                   | 0.5   | 0.342               | fail          |
| L-aspartic_acid              | 1.186      | 1.162                     | pass                   | 0.556 | 0.398               | fail          |
| L-aspartic_acid_z            | 15.846     | 13.498                    | fail                   | 0.556 | 0.398               | fail          |
| L-glutamic_acid              | 1.697      | 0.651                     | pass                   | 0.5   | 0.342               | fail          |
| L-glutamic_acid_z            | 15.835     | 13.486                    | fail                   | 0.5   | 0.342               | fail          |
| L-glutamine                  | 0.564      | 1.784                     | pass                   | 0.5   | 0.342               | fail          |
| L-glutathione                | 0.646      | 1.702                     | pass                   | 0.45  | 0.292               | pass          |
| L-lactic_acid                | 2.587      | 0.239                     | pass                   | 0.5   | 0.342               | fail          |
| L-leucine                    | 3.422      | 1.074                     | pass                   | 0.333 | 0.175               | pass          |
| L-methionine                 | 2.085      | 0.264                     | pass                   | 0.333 | 0.175               | pass          |
| L-phenylalanine              | 1.37       | 0.978                     | pass                   | 0.25  | 0.092               | pass          |
| L-proline                    | 1.545      | 0.804                     | pass                   | 0.375 | 0.217               | pass          |
| L-serine                     | 4.362      | 2.014                     | pass                   | 0.571 | 0.414               | fail          |
| L-tartaric_acid              | 3.295      | 0.946                     | pass                   | 0.6   | 0.442               | fail          |
| L-tryptophan                 | 0.932      | 1.416                     | pass                   | 0.267 | 0.109               | pass          |
| L-tyrosine                   | 1.737      | 0.611                     | pass                   | 0.308 | 0.15                | pass          |
| Molecule Name                | 0.88       | 1.468                     | pass                   | 0.182 | 0.024               | pass          |
| N-ethylacetamide             | 1.656      | 0.693                     | pass                   | 0.333 | 0.175               | pass          |
| acesulfame                   | 2.386      | 0.038                     | pass                   | 0.5   | 0.342               | fail          |
| acetic_acid                  | 0.86       | 1.489                     | pass                   | 0.5   | 0.342               | fail          |
| acetophenone_oxime           | 1.223      | 1.125                     | pass                   | 0.2   | 0.042               | pass          |
| acetylenedicarboxylic_acid   | 0.428      | 1.92                      | pass                   | 0.5   | 0.342               | fail          |

|                             |       |       |      |       |       |      |
|-----------------------------|-------|-------|------|-------|-------|------|
| <b>adipic_acid</b>          | 0.013 | 2.336 | pass | 0.4   | 0.242 | pass |
| <b>alitame</b>              | 1.98  | 0.368 | pass | 0.318 | 0.16  | pass |
| <b>apigenin</b>             | 0.493 | 1.856 | pass | 0.25  | 0.092 | pass |
| <b>azelaic_acid</b>         | 0.928 | 1.42  | pass | 0.308 | 0.15  | pass |
| <b>benzoic_acid</b>         | 0.991 | 1.357 | pass | 0.222 | 0.064 | pass |
| <b>biotin</b>               | 1.638 | 0.711 | pass | 0.313 | 0.155 | pass |
| <b>caprolactam</b>          | 2.061 | 0.287 | pass | 0.25  | 0.092 | pass |
| <b>capsaicin</b>            | 2.166 | 0.183 | pass | 0.182 | 0.024 | pass |
| <b>cholic_acid</b>          | 4.539 | 2.191 | pass | 0.172 | 0.015 | pass |
| <b>citric_acid</b>          | 1.783 | 0.566 | pass | 0.538 | 0.381 | fail |
| <b>ethylparaben</b>         | 3.594 | 1.245 | pass | 0.25  | 0.092 | pass |
| <b>folic_acid</b>           | 2.021 | 0.328 | pass | 0.406 | 0.248 | pass |
| <b>fumaric_acid</b>         | 2.637 | 0.288 | pass | 0.5   | 0.342 | fail |
| <b>gentisic_acid</b>        | 2.843 | 0.495 | pass | 0.364 | 0.206 | pass |
| <b>glutaric_acid</b>        | 2.449 | 0.1   | pass | 0.444 | 0.287 | pass |
| <b>glycine</b>              | 1.007 | 1.341 | pass | 0.6   | 0.442 | fail |
| <b>glycolic_acid</b>        | 1.422 | 0.927 | pass | 0.6   | 0.442 | fail |
| <b>hesperetin</b>           | 5.599 | 3.25  | pass | 0.273 | 0.115 | pass |
| <b>hippuric_acid</b>        | 2.176 | 0.172 | pass | 0.308 | 0.15  | pass |
| <b>hydrocinnamic_acid</b>   | 0.852 | 1.496 | pass | 0.182 | 0.024 | pass |
| <b>imidazole</b>            | 1.319 | 1.03  | pass | 0.4   | 0.242 | pass |
| <b>isonicotinamide</b>      | 1.272 | 1.077 | pass | 0.333 | 0.175 | pass |
| <b>ketoglutaric_acid</b>    | 1.37  | 0.978 | pass | 0.5   | 0.342 | fail |
| <b>lactobionic_acid</b>     | 8.72  | 6.372 | fail | 0.5   | 0.342 | fail |
| <b>lactose</b>              | 4.554 | 2.206 | pass | 0.478 | 0.32  | fail |
| <b>maleic_acid</b>          | 4.208 | 1.859 | pass | 0.5   | 0.342 | fail |
| <b>malic_acid</b>           | 3.291 | 0.942 | pass | 0.556 | 0.398 | fail |
| <b>malonic_acid</b>         | 1.699 | 0.65  | pass | 0.571 | 0.414 | fail |
| <b>maltitol</b>             | 7.131 | 4.782 | pass | 0.478 | 0.32  | fail |
| <b>mannitol</b>             | 4.66  | 2.312 | pass | 0.5   | 0.342 | fail |
| <b>methanesulfonic_acid</b> | 2.599 | 0.25  | pass | 0.6   | 0.442 | fail |
| <b>methylparaben</b>        | 1.291 | 1.057 | pass | 0.273 | 0.115 | pass |
| <b>monobutyryn</b>          | 3.488 | 1.139 | pass | 0.364 | 0.206 | pass |
| <b>nicotinamide</b>         | 2.435 | 0.086 | pass | 0.333 | 0.175 | pass |
| <b>oxalic_acid</b>          | 2.623 | 0.275 | pass | 0.667 | 0.509 | fail |
| <b>pamoic_acid</b>          | 0.233 | 2.115 | pass | 0.207 | 0.049 | pass |
| <b>phthalamide</b>          | 2.875 | 0.526 | pass | 0.333 | 0.175 | pass |
| <b>pimelic_acid</b>         | 1.664 | 0.684 | pass | 0.364 | 0.206 | pass |
| <b>piperazine</b>           | 0.001 | 2.348 | pass | 0.333 | 0.175 | pass |
| <b>propylparaben</b>        | 2.286 | 0.062 | pass | 0.231 | 0.073 | pass |
| <b>pyrazine</b>             | 0     | 2.348 | pass | 0.333 | 0.175 | pass |
| <b>riboflavin</b>           | 3.978 | 1.63  | pass | 0.37  | 0.212 | pass |
| <b>saccharin</b>            | 2.141 | 0.208 | pass | 0.333 | 0.175 | pass |
| <b>sorbic_acid</b>          | 1.028 | 1.321 | pass | 0.25  | 0.092 | pass |

---

|                              |       |       |      |       |       |      |
|------------------------------|-------|-------|------|-------|-------|------|
| <b>suberic_acid</b>          | 0.01  | 2.339 | pass | 0.333 | 0.175 | pass |
| <b>succinic_acid</b>         | 1.076 | 1.273 | pass | 0.5   | 0.342 | fail |
| <b>t-butylamine</b>          | 0.771 | 1.577 | pass | 0.2   | 0.042 | pass |
| <b>t-butylhydroxyanisole</b> | 0.688 | 1.66  | pass | 0.154 | 0.004 | pass |
| <b>theophylline</b>          | 0.736 | 1.612 | pass | 0.462 | 0.304 | fail |
| <b>thymidine</b>             | 4.421 | 2.072 | pass | 0.412 | 0.254 | pass |
| <b>triphenylacetic_acid</b>  | 3.073 | 0.724 | pass | 0.091 | 0.067 | pass |
| <b>urea</b>                  | 1.44  | 0.908 | pass | 0.75  | 0.592 | fail |
| <b>valerolactam</b>          | 2.028 | 0.321 | pass | 0.286 | 0.128 | pass |
| <b>xanthine</b>              | 1.202 | 1.147 | pass | 0.545 | 0.388 | fail |

---

### T3 Excess Enthalpy Computational Results ( $H_{ex}$ )

| <b>Cofomer</b>          | <b>Cofomer Ranking</b> | <b>H_ex[kcal/mol]</b> |
|-------------------------|------------------------|-----------------------|
| Oxalic acid             | 2.0                    | -2.954825             |
| 1,3,5-trihydroxybenzene | 3.0                    | -2.799725             |
| 1,3,5-trihydroxybenzene | 61.0                   | -2.355095             |
| 4,4-biphenol            | 5.0                    | -2.251965             |
| 1,3-dihydroxybenzene    | 4.0                    | -2.22683              |
| 1-naphthol              | 1.0                    | -2.18447              |
| Citric acid             | 75.0                   | -2.096455             |
| Caffeic Acid            | 47.0                   | -1.758385             |
| Maleic acid             | 40.0                   | -1.429405             |
| salicyclic acid         | 16.0                   | -1.318445             |
| Succinic acid           | 69.0                   | -1.018895             |
| 3-cyanophenol           | 6.0                    | -0.792715             |
| 4-cyanophenol           | 7.0                    | -0.619655             |
| benzoic acid            | 26.0                   | -0.616155             |
| Glutaric acid           | 74.0                   | -0.613015             |
| ethine                  | 8.0                    | -0.5671               |
| N,N-dimethylacetamid    | 9.0                    | -0.467125             |
| chloroform              | 10.0                   | -0.46157              |
| dimethylsulfoxide       | 11.0                   | -0.454585             |
| ch2cl2                  | 12.0                   | -0.38096              |
| H2S                     | 13.0                   | -0.339                |
| O2                      | 14.0                   | -0.337435             |
| aceticacid              | 15.0                   | -0.313905             |
| salicylamide            | 62.0                   | -0.30981              |
| N2                      | 17.0                   | -0.26738              |

---

|                                    |      |           |
|------------------------------------|------|-----------|
| bicalutamide                       | 79.0 | -0.24997  |
| 1,2-bis(4-pyridyl)ethane           | 63.0 | -0.221575 |
| propyne                            | 18.0 | -0.21726  |
| propanone                          | 19.0 | -0.19655  |
| 1,3-dimethyluracil                 | 20.0 | -0.1916   |
| CO2                                | 21.0 | -0.185465 |
| butanone                           | 22.0 | -0.13166  |
| dioxane                            | 23.0 | -0.12839  |
| 4,4'-bipyridine                    | 24.0 | -0.119535 |
| trans-1,2-bis(4-dipyridyl)ethylene | 50.0 | -0.11687  |
| Tetrahydrofuran                    | 25.0 | -0.113755 |
| 5-hydroxyisoquinoline              | 27.0 | -0.092535 |
| ethylacetate                       | 51.0 | -0.09165  |
| Paracetamol                        | 66.0 | -0.08152  |
| Pyrazole                           | 28.0 | -0.06335  |
| 3-hydroxypyridine                  | 29.0 | -0.060765 |
| Pyrimidine                         | 30.0 | -0.05502  |
| Vanillin                           | 67.0 | -0.050325 |
| 4-phenylpyridine                   | 31.0 | -0.049065 |
| 2,3,5,6-tetramethylpyrazine        | 32.0 | -0.033215 |
| carbonmonoxide                     | 33.0 | 0.010035  |
| 4-methyl-2-pentanone               | 57.0 | 0.01093   |
| acetonitrile                       | 34.0 | 0.045595  |
| 1-cyanonaphthalene                 | 35.0 | 0.05355   |
| 4-pyridinecarbonitrile             | 36.0 | 0.064005  |
| 3-cyanopyridine                    | 37.0 | 0.070505  |
| Carbamazepine                      | 60.0 | 0.095515  |

---

---

|                    |      |          |
|--------------------|------|----------|
| 1,4-dicyanobenzene | 38.0 | 0.095775 |
| 1,3-dicyanobenzene | 39.0 | 0.09824  |
| Theophylline       | 41.0 | 0.117675 |
| PVC                | 77.0 | 0.12384  |
| Piperazine         | 42.0 | 0.168235 |
| toluene            | 43.0 | 0.188335 |
| Cinnamic acid      | 78.0 | 0.194    |
| water              | 44.0 | 0.240205 |
| propene            | 45.0 | 0.25425  |
| CH4                | 46.0 | 0.255795 |
| isonicotinamide    | 64.0 | 0.299325 |
| ethane             | 48.0 | 0.32012  |
| Imidazole          | 49.0 | 0.332375 |
| Urea               | 65.0 | 0.339235 |
| methanol           | 52.0 | 0.43003  |
| ethanol            | 53.0 | 0.43315  |
| D-fructopyranose   | 80.0 | 0.436215 |
| propane            | 54.0 | 0.45813  |
| 1-propanol         | 68.0 | 0.47973  |
| ethyleneglycol     | 72.0 | 0.496185 |
| 2-propanol         | 55.0 | 0.496415 |
| CCl4               | 56.0 | 0.501245 |
| 1-butanol          | 73.0 | 0.52779  |
| isobutane          | 58.0 | 0.52983  |
| butane             | 59.0 | 0.538635 |
| 1-pentanol         | 76.0 | 0.57583  |
| mannitol           | 83.0 | 0.597615 |
| Xylitol            | 82.0 | 0.686335 |

---

---

|               |      |          |
|---------------|------|----------|
| 1-octanol     | 81.0 | 0.749195 |
| 1-hexadecanol | 84.0 | 1.0178   |
| SF6           | 70.0 | 1.07676  |

---

#### T4. Hansen Solubility Parameter Results ( $\Delta\delta_i$ )

COSMOQuick predicts miscibility of API and coformer through Hansen solubility parameter (HSP) model and hydrogen bonding contributions of dispersion ( $\delta_d$ ), polar ( $\delta_p$ ), and hydrogen bonding ( $\delta_h$ ). Manual calculation from each of hydrogen bonding total solubility parameter,  $\delta_t$  are calculated with equation below:

$$\delta_t = \sqrt{(\delta_d^2 + \delta_p^2 + \delta_h^2)}$$

| Compound                           | $\delta_d$  | $\delta_p$  | $\delta_h$  | $\delta_t$  |
|------------------------------------|-------------|-------------|-------------|-------------|
| <b>Pyrazole</b>                    | 18.77322664 | 5.54310668  | 7.75066001  | 4.239299032 |
| <b>Succinic acid</b>               | 17.12187336 | 12.36820952 | 22.95403332 | 5.900855435 |
| <b>Urea</b>                        | 18.66475524 | 17.67501992 | 22.60313324 | 8.937433068 |
| <b>Vanillin</b>                    | 19.24346664 | 9.58553339  | 12.2293534  | 0.558802436 |
| <b>2,3,5,6-tetramethylpyrazine</b> | 18.93787332 | 6.51815333  | 6.62550668  | 4.196737704 |
| <b>Isonicotinamide</b>             | 19.83464656 | 14.43869336 | 13.03194663 | 2.487467631 |
| <b>Theophylline</b>                | 19.46954    | 13.55249341 | 12.39651346 | 1.4733793   |
| <b>Benzoic acid</b>                | 19.85212    | 7.10066     | 10.97915324 | 1.521238055 |
| <b>Carbamazepine</b>               | 20.22008672 | 11.05924666 | 12.60337334 | 0.975530774 |
| <b>D-fructopyranose</b>            | 17.86628672 | 10.42657995 | 22.31719324 | 5.137441605 |
| <b>Citric acid</b>                 | 18.39889512 | 15.7186934  | 25.40754652 | 9.795212013 |
| <b>Salicylic acid</b>              | 18.89833988 | 8.12237336  | 13.85173996 | 0.493383788 |
| <b>Maleic acid</b>                 | 17.42398    | 11.78112472 | 21.27283332 | 4.622876787 |
| <b>Piperazine</b>                  | 17.64418668 | 5.6790933   | 8.43567331  | 4.927472801 |
| <b>Salicylamide</b>                | 18.95727996 | 10.16691994 | 13.09594668 | 0.108102218 |
| <b>Mannitol</b>                    | 13.99137336 | 9.25473997  | 27.45759336 | 6.884122039 |
| <b>Caffeic acid</b>                | 18.88592668 | 8.40279333  | 17.64047324 | 1.88243751  |
| <b>Xylitol</b>                     | 17.98564668 | 12.7586933  | 28.63416668 | 10.84876335 |
| <b>1,3-dimethyluracil</b>          | 19.58035328 | 11.30177987 | 8.51660001  | 1.133483703 |

|                                           |             |             |             |             |
|-------------------------------------------|-------------|-------------|-------------|-------------|
| <b>Glutaric acid</b>                      | 17.14839996 | 12.14601332 | 20.98627336 | 4.406376012 |
| <b>Cinnamic acid</b>                      | 17.98155332 | 4.78679999  | 4.21465999  | 6.213267207 |
| <b>Imidazole</b>                          | 20.05511996 | 14.40674096 | 14.33846668 | 3.262004226 |
| <b>2,3-dihydroxybutanedioic acid</b>      | 16.9850666  | 13.66679333 | 26.87741992 | 9.314967074 |
| <b>Pyrimidine</b>                         | 19.72997336 | 9.33724672  | 8.91169338  | 1.715407089 |
| <b>Oxalic acid</b>                        | 17.0799666  | 17.37136008 | 26.3317266  | 10.58028708 |
| <b>3-cyanophenol</b>                      | 19.98021332 | 11.93819989 | 12.92667327 | 1.331438025 |
| <b>1,2-bis(4-pyridyl)ethane</b>           | 19.35344008 | 7.50296665  | 7.35365335  | 3.271350055 |
| <b>trans-1,2-bis(4-dipyridyl)ethylene</b> | 19.46542008 | 7.38621999  | 8.04660001  | 2.971851805 |
| <b>4,4'-bipyridine</b>                    | 19.6192534  | 7.60889998  | 7.14309997  | 3.070010069 |
| <b>4-phenylpyridine</b>                   | 19.95288    | 7.06706666  | 5.45785334  | 3.432635952 |
| <b>4-pyridinecarbonitrile</b>             | 19.79666004 | 11.72653994 | 10.0122934  | 0.19925718  |
| <b>3-cyanopyridine</b>                    | 19.87971344 | 12.1720666  | 10.07004671 | 0.099889497 |
| <b>1-cyanonaphthalene</b>                 | 20.1111466  | 8.81365998  | 5.14312     | 2.740442629 |
| <b>1-naphthol</b>                         | 19.84418668 | 6.37207333  | 12.37933994 | 1.051042365 |
| <b>1,3-dicyanobenzene</b>                 | 19.92822    | 14.32692664 | 7.88277999  | 0.486143748 |
| <b>1,4-dicyanobenzene</b>                 | 19.92187332 | 13.9718999  | 7.31852663  | 0.117365226 |
| <b>1,3,5-trihydroxybenzene</b>            | 19.1311     | 9.58726003  | 19.30518    | 3.527816386 |
| <b>4,4-biphenol</b>                       | 19.57990668 | 9.45268002  | 14.8740066  | 1.050764247 |
| <b>1,3-dihydroxybenzene</b>               | 19.45106668 | 8.91450003  | 17.74567324 | 2.505469836 |
| <b>bicalutamide</b>                       | 19.5246134  | 13.50342012 | 13.36025993 | 1.948190391 |
| <b>3-hydroxypyridine</b>                  | 19.96201992 | 11.02802    | 18.31501312 | 3.957207364 |
| <b>5-hydroxyisoquinoline</b>              | 19.85749992 | 10.64785992 | 18.58307984 | 3.914250621 |
| <b>4-cyanophenol</b>                      | 19.92549996 | 14.06397323 | 13.1042067  | 2.394085265 |
| <b>1-hexadecanol</b>                      | 16.28820668 | 3.66762     | 8.26987335  | 6.660487905 |

|                             |             |             |             |             |
|-----------------------------|-------------|-------------|-------------|-------------|
| <b>Paracetamol</b>          | 18.40496664 | 10.23887332 | 15.23060668 | 0.698925943 |
| <b>CCl4</b>                 | 17.02672    | 4.05138573  | 0.25638     | 7.788432824 |
| <b>toluene</b>              | 18.12055336 | 1.53714667  | 2.20385334  | 6.973708195 |
| <b>chloroform</b>           | 17.42837332 | 4.16910664  | 5.00202001  | 6.687291013 |
| <b>water</b>                | 16.21935064 | 17.27807619 | 25.34473264 | 9.405656899 |
| <b>1-octanol</b>            | 15.95663332 | 5.10407333  | 11.22444668 | 5.126732058 |
| <b>1-pentanol</b>           | 15.86908656 | 5.74172     | 13.76912672 | 3.51203324  |
| <b>ethyleneglycol</b>       | 16.87202664 | 11.31738006 | 25.11576948 | 7.011634571 |
| <b>1-butanol</b>            | 15.90185988 | 5.81462667  | 15.62044656 | 2.255957873 |
| <b>1-propanol</b>           | 15.9108466  | 6.99722     | 16.8354066  | 1.094314516 |
| <b>ethanol</b>              | 15.695      | 8.50189998  | 18.49297332 | 0.40985102  |
| <b>ch2cl2</b>               | 16.91586652 | 7.10505334  | 6.63725334  | 5.781334018 |
| <b>2-propanol</b>           | 15.71431328 | 6.67912003  | 16.26231984 | 1.712458869 |
| <b>methanol</b>             | 15.1372266  | 11.26026675 | 19.79657332 | 2.054151683 |
| <b>aceticacid</b>           | 15.2951734  | 9.21440663  | 13.57783344 | 2.860158549 |
| <b>dimethylsulfoxide</b>    | 17.80159328 | 16.55738672 | 10.36657999 | 1.136941367 |
| <b>N,N-dimethylacetamid</b> | 16.73524    | 12.31542681 | 9.01604663  | 2.642292458 |
| <b>4-methyl-2-pentanone</b> | 15.41596004 | 6.48145333  | 4.51560667  | 7.970391499 |
| <b>butanone</b>             | 15.83687336 | 9.56544006  | 5.64962668  | 5.947562917 |
| <b>propanone</b>            | 15.46038664 | 11.3044201  | 7.27880668  | 4.803506708 |
| <b>acetonitrile</b>         | 15.2462868  | 16.74816665 | 7.41137334  | 1.462186066 |
| <b>ethylacetate</b>         | 15.72590668 | 6.29512     | 7.28429331  | 6.853478307 |
| <b>thf</b>                  | 17.05585312 | 6.07534667  | 6.90978     | 5.913100179 |
| <b>dioxane</b>              | 17.34798668 | 4.83574668  | 8.08738666  | 5.550486354 |
| <b>PVC</b>                  | 18.11744676 | 7.39690668  | 6.32369333  | 4.726762238 |
| <b>O2</b>                   | 14.91224668 | 2.60827999  | 1.55226667  | 10.07438616 |
| <b>N2</b>                   | 14.13333344 | 1.46378667  | 1.56226667  | 10.99783323 |
| <b>CO2</b>                  | 15.38702672 | 6.54075334  | 4.30586667  | 8.02732698  |

---

|                       |             |             |             |             |
|-----------------------|-------------|-------------|-------------|-------------|
| <b>carbonmonoxide</b> | 13.41376004 | 13.63273338 | 11.88912675 | 2.772808739 |
| <b>CH4</b>            | 14.22037336 | 0.65427333  | 0.45871333  | 11.04958828 |
| <b>ethane</b>         | 14.79004676 | 0.60966666  | 0.36754     | 10.48522455 |
| <b>propyne</b>        | 14.77817336 | 4.89016667  | 4.22220665  | 9.163687531 |
| <b>propene</b>        | 14.38415904 | 2.08588     | 1.16014667  | 10.7115548  |
| <b>propane</b>        | 13.70703348 | 0.22415334  | 0.09783333  | 11.58317858 |
| <b>SF6</b>            | 14.89656672 | 2.17836665  | 0.02697333  | 10.23737112 |
| <b>ethine</b>         | 13.88644008 | 5.00618665  | 8.7956734   | 8.10929186  |
| <b>butane</b>         | 14.04292668 | 0.14513334  | 0.10714667  | 11.24830846 |
| <b>isobutane</b>      | 14.30778012 | 0.37902667  | 0.02157333  | 10.97957795 |
| <b>H2S</b>            | 16.67465996 | 6.58028667  | 9.59420001  | 4.960322338 |

---

## T5. Overlapping Coformer Screening Results through GNN-based and In-silico Tools

| <b>Two-way Overlap</b>               |                                                                                                                                                                                                                                                                                                                                                                                                                                                                                                                                                                                                                                                                                                                                                                          |
|--------------------------------------|--------------------------------------------------------------------------------------------------------------------------------------------------------------------------------------------------------------------------------------------------------------------------------------------------------------------------------------------------------------------------------------------------------------------------------------------------------------------------------------------------------------------------------------------------------------------------------------------------------------------------------------------------------------------------------------------------------------------------------------------------------------------------|
| <b><math>H_{ex} \cap HSP</math></b>  | 1,3,5-Trihydroxybenzene, 1,3-Dihydroxybenzene, 1,3-Dimethyluracil, 1-Naphthol, 2,3,5,6-Tetramethylpyrazine, 3-Cyanophenol, 3-Hydroxypyridine, 4,4'-Bipyridine, 4,4-Biphenol, 4-Cyanophenol, 4-Phenylpyridine, 5-Hydroxyisoquinoline, Acetic acid, Benzoic acid, Bicalutamide, Butanone, Caffeic acid, Chloroform, Dichloromethane, Dimethyl sulfoxide, Dioxane, Ethyl acetate, Glutaric acid, H <sub>2</sub> S, Maleic acid, N,N-Dimethylacetamide, Paracetamol, Propanone, Pyrazole, Pyrimidine, Salicylic acid, Salicylamide, Succinic acid, Tetrahydrofuran, trans-1,2-Bis(4-pyridyl)ethylene, Vanillin                                                                                                                                                               |
| <b><math>H_{ex} \cap MC</math></b>   | Benzoic acid, Glutaric acid, Salicylic acid, Salicylamide                                                                                                                                                                                                                                                                                                                                                                                                                                                                                                                                                                                                                                                                                                                |
| <b><math>H_{ex} \cap CCPT</math></b> | 1,3,5-Trihydroxybenzene, 1,3-Dihydroxybenzene, 1,3-Dimethyluracil, 1-Naphthol, 2,3,5,6-Tetramethylpyrazine, 3-Cyanophenol, 3-Hydroxypyridine, 4,4'-Bipyridine, 4,4-Biphenol, 4-Cyanophenol, 4-Phenylpyridine, 5-Hydroxyisoquinoline, Acetic acid, Benzoic acid, Bicalutamide, Butanone, Caffeic acid, Carbamazepine, Chloroform, Cinnamic acid, Citric acid, Dichloromethane, Dimethyl sulfoxide, Dioxane, Ethyl acetate, Fumaric acid, Glutaric acid, H <sub>2</sub> S, Imidazole, Isonicotinamide, Maleic acid, Mannitol, N,N-Dimethylacetamide, Oxalic acid, Paracetamol, Piperazine, Propanone, Pyrazole, Pyrimidine, Salicylic acid, Salicylamide, Succinic acid, Tartaric acid, Tetrahydrofuran, Theophylline, trans-1,2-Bis(4-pyridyl)ethylene, Urea<br>Vanillin, |
| <b><math>HSP \cap MC</math></b>      | Benzoic acid, Glutaric acid, Imidazole, Isonicotinamide, Piperazine, Salicylic acid, Salicylamide                                                                                                                                                                                                                                                                                                                                                                                                                                                                                                                                                                                                                                                                        |
| <b><math>HSP \cap CCPT</math></b>    | 1,3,5-Trihydroxybenzene, 1,3-Dihydroxybenzene, 1,3-Dimethyluracil, 1-Naphthol, 2,3,5,6-Tetramethylpyrazine, 3-Cyanophenol, 3-Hydroxypyridine, 4,4'-Bipyridine, 4,4-Biphenol, 4-Cyanophenol<br>4-Phenylpyridine, 5-Hydroxyisoquinoline, Acetic acid,                                                                                                                                                                                                                                                                                                                                                                                                                                                                                                                      |

|                                         |                                                                                                                                                                                                                                                                                                                                                                                                                                                                                                                       |
|-----------------------------------------|-----------------------------------------------------------------------------------------------------------------------------------------------------------------------------------------------------------------------------------------------------------------------------------------------------------------------------------------------------------------------------------------------------------------------------------------------------------------------------------------------------------------------|
|                                         | Benzoic acid, Bicalutamide, Butanone, Caffeic acid, Carbamazepine, Chloroform, Cinnamic acid, Citric acid, Dichloromethane, Dimethyl sulfoxide, Dioxane, Ethyl acetate, Fumaric acid, Glutaric acid, H <sub>2</sub> S, Imidazole, Isonicotinamide, Maleic acid, Mannitol, N,N-Dimethylacetamide, Oxalic acid, Paracetamol, Piperazine, Propanone, Pyrazole, Pyrimidine, Salicylic acid, Salicylamide, Succinic acid, Tartaric acid, Tetrahydrofuran, Theophylline, trans-1,2-Bis(4-pyridyl)ethylene, Urea<br>Vanillin |
| <b>CCPT ∩ MC</b>                        | Benzoic acid, Glutaric acid, Imidazole, Isonicotinamide, Piperazine, Pyrazole, Pyrazine, Salicylic acid                                                                                                                                                                                                                                                                                                                                                                                                               |
| <b>Three-way Overlap</b>                |                                                                                                                                                                                                                                                                                                                                                                                                                                                                                                                       |
| <b>MC ∩ HSP ∩ CCPT</b>                  | Benzoic acid, Glutaric acid, Imidazole, Isonicotinamide                                                                                                                                                                                                                                                                                                                                                                                                                                                               |
| <b>MC ∩ HSP ∩ H<sub>ex</sub></b>        | Benzoic acid, glutaric acid, salicylic acid, salicylamide                                                                                                                                                                                                                                                                                                                                                                                                                                                             |
| <b>HSP ∩ H<sub>ex</sub> ∩ CCPT</b>      | Pyrazole, salicylic acid, 2,3,5,6-tetramethylpyrazine, benzoic acid, vanillin, 1,3-dimethyluracil, glutaric acid, mannitol                                                                                                                                                                                                                                                                                                                                                                                            |
| <b>MC ∩ H<sub>ex</sub> ∩ CCPT</b>       | Pyrazole, salicylic acid, benzoic acid, glutaric acid                                                                                                                                                                                                                                                                                                                                                                                                                                                                 |
| <b>Four-way Overlap</b>                 |                                                                                                                                                                                                                                                                                                                                                                                                                                                                                                                       |
| <b>MC ∩ HSP ∩ CCPT ∩ H<sub>ex</sub></b> | Benzoic acid, glutaric acid, salicylic acid                                                                                                                                                                                                                                                                                                                                                                                                                                                                           |

**T6.** Crystallographic data of 2:3:1 Modafinil Acid – Isonicotinamide – H<sub>2</sub>O Cocrystal Hydrate

| Identification    | Cocrystal Hydrate MODI                                                           |
|-------------------|----------------------------------------------------------------------------------|
| Empirical formula | C <sub>102</sub> H <sub>102</sub> N <sub>12</sub> O <sub>20</sub> S <sub>4</sub> |
| Formula weight    | 1944.19                                                                          |
| Temperature/K     | 100.00(10)                                                                       |
| Crystal System    | TRICLINIC                                                                        |
| Space Group       | <i>P</i> - <i>1</i>                                                              |
| <i>a</i> /Å       | 8.7434(4)                                                                        |

---

|                                                  |                                       |
|--------------------------------------------------|---------------------------------------|
| $b/\text{Å}$                                     | 10.8237(5)                            |
| $c/\text{Å}$                                     | 25.1996(11)                           |
| $\alpha/^\circ$                                  | 84.465(4)                             |
| $\beta/^\circ$                                   | 80.705(4)                             |
| $\gamma/^\circ$                                  | 71.166(4)                             |
| Volume/ $\text{Å}^3$                             | 2224.96(18)                           |
| $Z$                                              | 1                                     |
| $\rho_{\text{calc}}(\text{g}/\text{cm}^3)$       | 1.451                                 |
| $\mu/\text{mm}^{-1}$                             | 1.675                                 |
| Radiation                                        | Cu K $\alpha$ ( $\lambda = 1.54184$ ) |
| $2\theta$ range for data<br>collection/ $^\circ$ | 3.556 to 150.916                      |
| Reflections collected                            | 31221                                 |
| Goodness-of-fit on $F^2$                         | 1.116                                 |
| Final R indexes<br>$[I \geq 2\sigma(I)]$         | $R_1 = 0.1076$ , $WR_2 = 0.2696$      |
| Final R indexes [all data]                       | $R_1 = 0.1271$ , $WR_2 = 0.2821$      |
| CCPT deposition                                  | 2537722                               |

---

**S1. Comparison of X-ray powder diffraction data of modafinil acid crystal system and combined with other coformers.**

**S2 Thermal analysis results through DSC of modafinil acid crystal system and various combination with other cofomers**

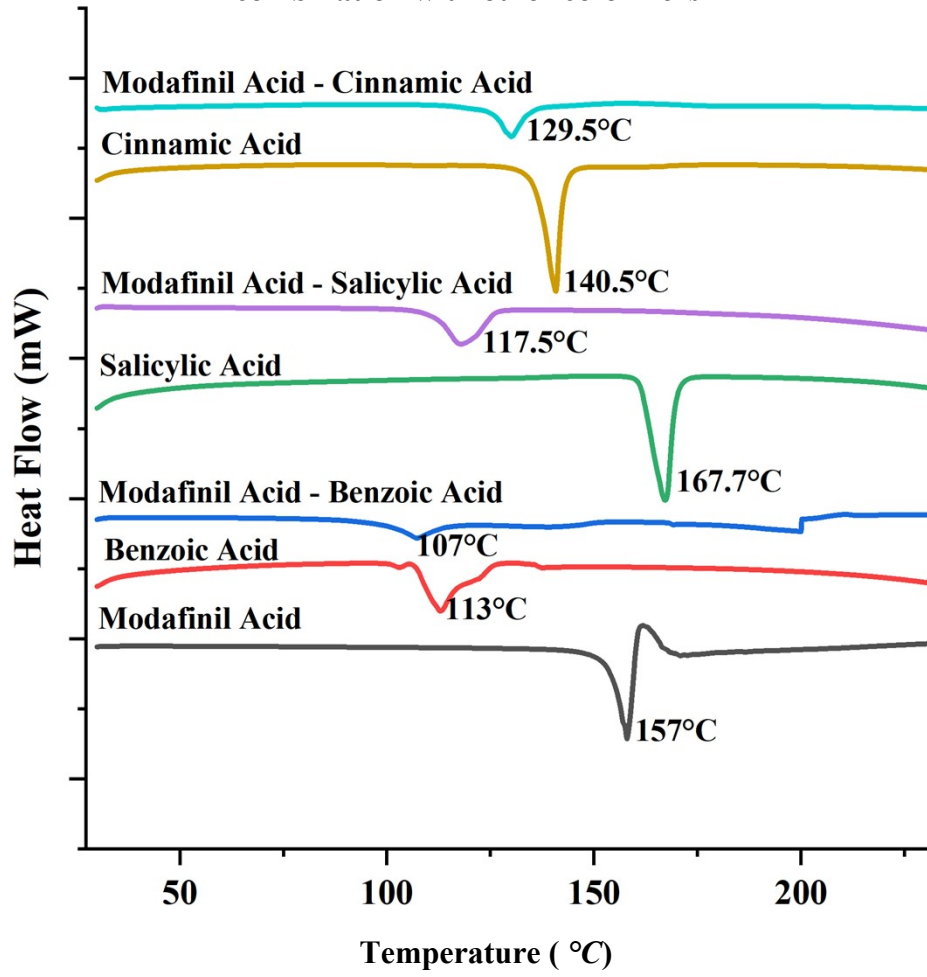

Supplement: d6ce00119j1.pdf [file d6ce00119j1.pdf]
